# Supplementary material for: Bifunctional CoNi/CoFe2O4 /Ni foam electrodes for efficient overall water splitting at a high current density
Source: Royal Society of Chemistry journal article supplement (doi:10.1039/c8ta08223e), 2018-01-01
Supplement: c8ta08223e1.pdf [file c8ta08223e1.pdf]

Supplementary Material for Journal of Materials Chemistry A.

# Supporting Information

## Bifunctional CoNi/CoFe<sub>2</sub>O<sub>4</sub> /Ni Foam Electrodes for Efficient Overall Water Splitting at a High Current Density

Shasha Li<sup>a,b,c</sup>, Suchada Sirisomboonchai<sup>a,c</sup>, Akihiro Yoshida<sup>a</sup>, Xiaowei An<sup>a,c</sup>,  
Xiaogang Hao<sup>\*b</sup>, Abuliti Abudula<sup>c</sup>, Guoqing Guan<sup>\*a</sup>

---

<sup>a</sup> Department of Chemical Engineering, Taiyuan University of Technology, Taiyuan 030024, China.

<sup>b</sup> Energy Conversion Engineering Laboratory, Institute of Regional Innovation (IRI), Hirosaki University, 2-1-3, Matsubara, Aomori 030-0813, Japan.

---

<sup>c</sup> Graduate School of Science and Technology, Hirosaki University, 1-Bunkyocho, Hirosaki 036-8560, Japan.

### Contents:

1. SEM images of Co<sub>3</sub>O<sub>4</sub>/NF(a) and CoNi/NF (b), and the TEM image of CoFe<sub>2</sub>O<sub>4</sub> (c, d) and CoNi NSs (e, f). (**Fig. S1**)
2. XPS spectra of flower-like CoFe<sub>2</sub>O<sub>4</sub>. (**Fig. S2**)
3. Original and iR-compensation polarization curves of CoNi/CoFe<sub>2</sub>O<sub>4</sub>/NF. (**Fig. S3**)
4. (a) HER polarization curves of CoNi/CoFe<sub>2</sub>O<sub>4</sub>/NF at the large current density without iR-compensation. (b) Nyquist plots (overpotential = 100 mV) for the samples. (**Fig. S4**)
5. HER polarization curves of CoNi/CoFe<sub>2</sub>O<sub>4</sub>/NF in 1.0 M KOH with graphite rod and Pt as the counter electrode. (The inset is the optical photograph showing the graphite rod as counter electrode of H<sub>2</sub> bubbles on the electrode.) (**Fig. S5**)
6. CVs of pure NF, CoNi/NF, Co<sub>3</sub>O<sub>4</sub>/NF, CoFe<sub>2</sub>O<sub>4</sub>/NF and CoNi/CoFe<sub>2</sub>O<sub>4</sub>/NF composite electrodes between the potential regions of 0.2 and 0.5 V (vs Hg/HgO)

with scan rates of 10, 20, 30, 50, 70, and 100 mV/s in KOH solution. (**Fig. S6**)

7. Polarization curve for overall water splitting of CoNi/CoFe<sub>2</sub>O<sub>4</sub>/NF to show the high current density performance. (The inset is the optical photograph showing the strong generation of H<sub>2</sub> and O<sub>2</sub> bubbles on the electrodes.) (**Fig. S7**)
8. Characterizations after the stability test. (a) SEM (b) High-resolution SEM images, and (c) EDS elemental mapping of the CoNi/CoFe<sub>2</sub>O<sub>4</sub>/NF after the overall water splitting stability test (anode for OER). (**Fig. S8**)

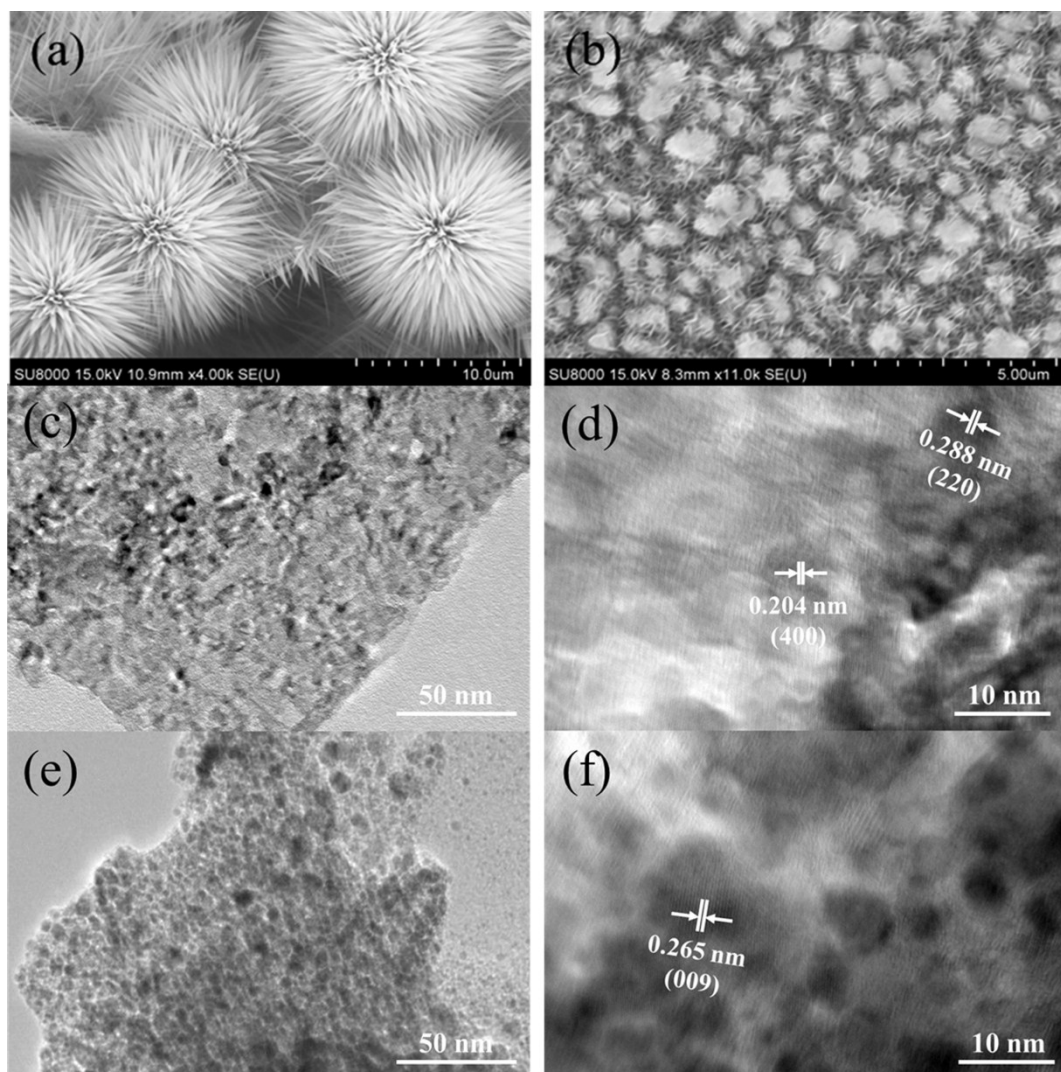

**Fig. S1** SEM images of Co<sub>3</sub>O<sub>4</sub>/NF(a) and CoNi/NF (b), and the TEM image of CoFe<sub>2</sub>O<sub>4</sub> (c, d) and CoNi NSs (e, f).

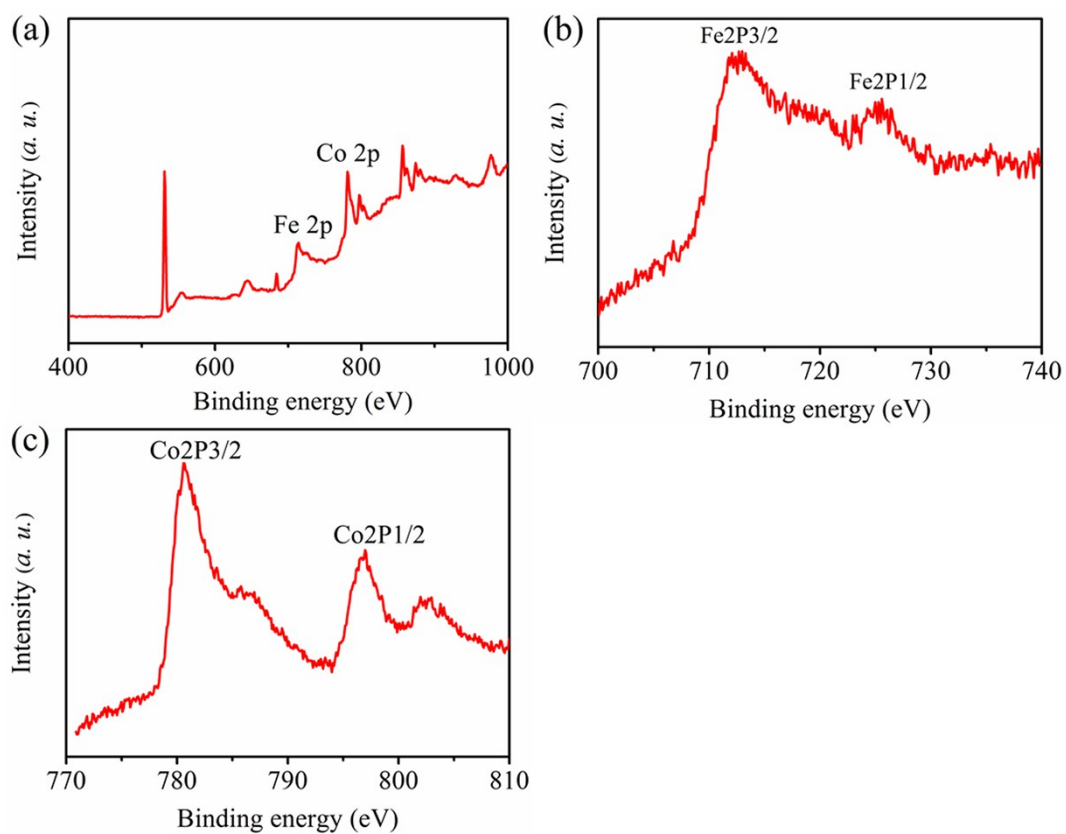

**Fig. S2** XPS spectra of flower-like  $\text{CoFe}_2\text{O}_4$ .

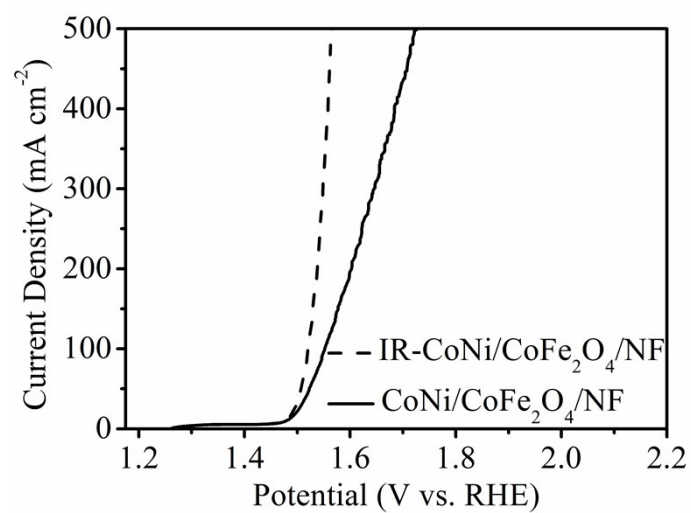

**Fig. S3** Original and iR-compensation polarization curves of CoNi/CoFe<sub>2</sub>O<sub>4</sub>/NF.

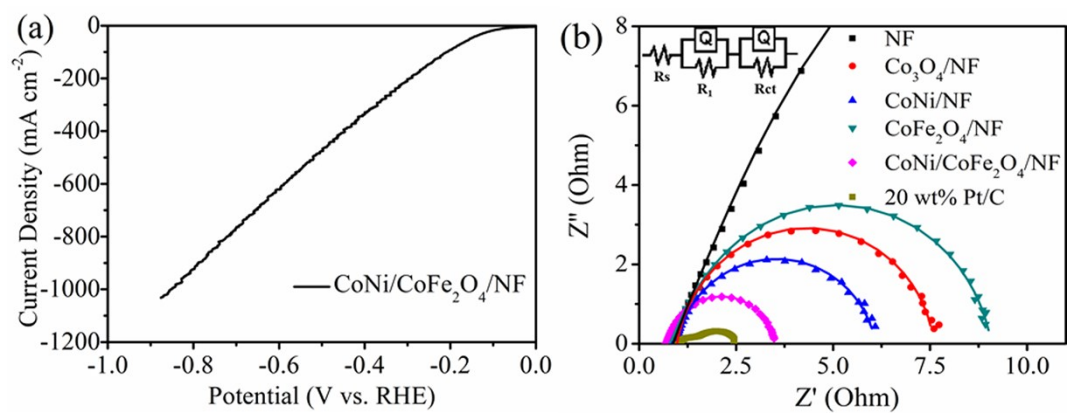

**Fig. S4** (a) HER polarization curves of CoNi/CoFe<sub>2</sub>O<sub>4</sub>/NF at the large current density without iR-compensation. (b) Nyquist plots (overpotential = 100 mV) for the samples.

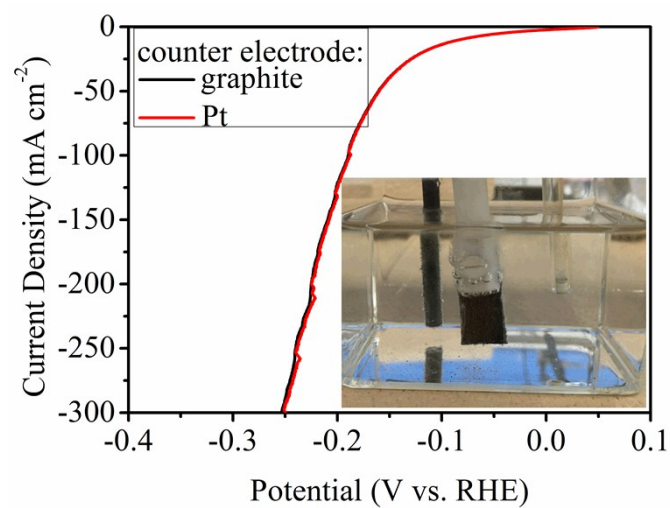

**Fig. S5** HER polarization curves of CoNi/CoFe<sub>2</sub>O<sub>4</sub>/NF in 1.0 M KOH with graphite rod and Pt as the counter electrode. (The inset is the optical photograph showing the graphite rod as counter electrode of H<sub>2</sub> bubbles on the electrode.)

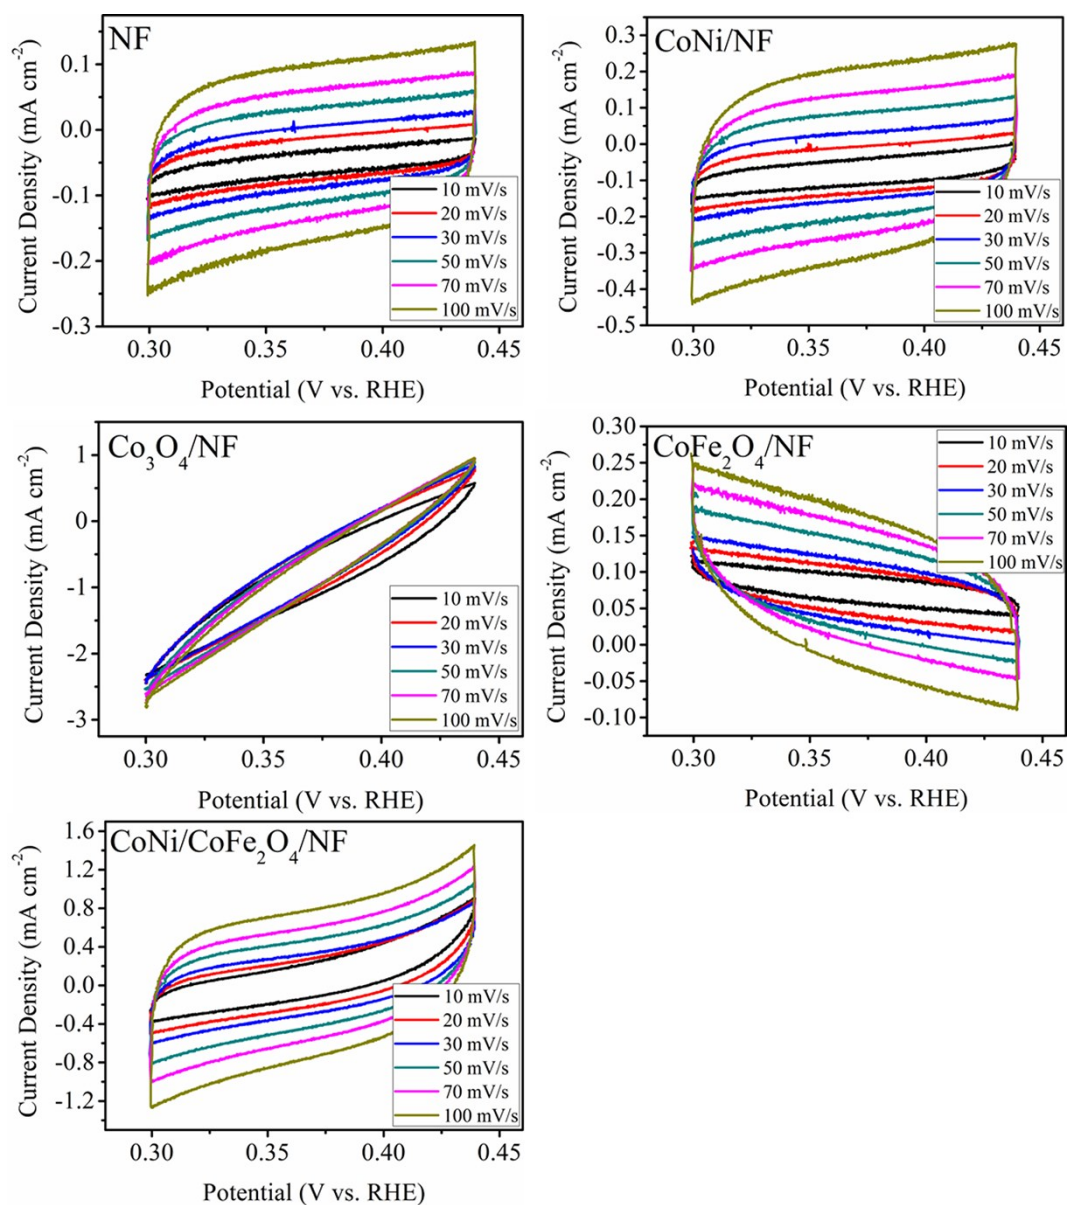

**Fig. S6** CVs of pure NF, CoNi/NF, Co<sub>3</sub>O<sub>4</sub>/NF, CoFe<sub>2</sub>O<sub>4</sub>/NF and CoNi/CoFe<sub>2</sub>O<sub>4</sub>/NF composite electrodes between the potential regions of 0.2 and 0.5 V (vs Hg/HgO) with scan rates of 10, 20, 30, 50, 70, and 100 mV/s in KOH solution.



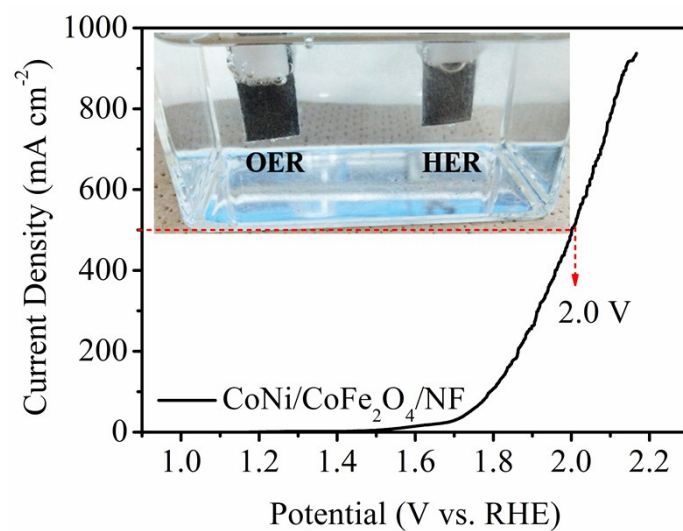

**Fig. S7** Polarization curve for overall water splitting of CoNi/CoFe<sub>2</sub>O<sub>4</sub>/NF to show the high current density performance. (The inset is the optical photograph showing the strong generation of H<sub>2</sub> and O<sub>2</sub> bubbles on the electrodes.)

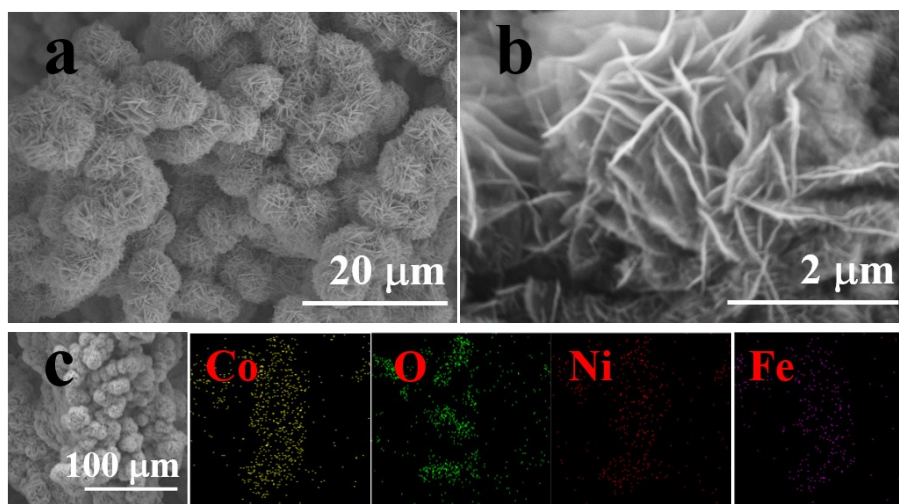

**Fig. S8** Characterizations after the stability test. (a) SEM (b) High-resolution SEM images, and (c) EDS elemental mapping of the CoNi/CoFe<sub>2</sub>O<sub>4</sub>/NF after the overall water splitting stability test (anode for OER).
